# Supplementary material for: Sorting out inherent features of head-to-head gene pairs by evolutionary conservation
Source: PubMed Central journal article supplement (PMC3024869; doi:10.1186/1471-2105-11-s11-s16), 2010-12-14
Supplement: 1471-2105-11-S11-S16-S1.pdf [file 1471-2105-11-S11-S16-S1.pdf]

**Supplementary Table 1.** Functional similarity of negatively correlated h2h gene pairs. The PCC between “Functional similarity” and “PCC” were merely 0.01.

| PosGeneID | NegGeneID | PosSymbol | NegSymbol | Functional similarity | MR      | PCC    |
|-----------|-----------|-----------|-----------|-----------------------|---------|--------|
| 149465    | 10969     | WDR65     | EBNA1BP2  | 0.061                 | 16981.1 | -0.115 |
| 163049    | 57474     | ZNF791    | ZNF490    | 1                     | 15814.7 | -0.065 |
| 169436    | 6836      | C9orf96   | SURF4     | 0.157                 | 14887   | -0.021 |
| 27158     | 94107     | NDOR1     | TMEM203   | 0.072                 | 17612.1 | -0.133 |
| 2967      | 1967      | GTF2H3    | EIF2B1    | 0.510                 | 15692.1 | -0.075 |
| 388531    | 84079     | RGS9BP    | ANKRD27   | 0.072                 | 16328   | -0.097 |
| 4720      | 9507      | NDUFS2    | ADAMTS4   | 0.522                 | 17881.3 | -0.12  |
| 54814     | 6633      | QPCTL     | SNRPD2    | 1                     | 16365.3 | -0.084 |
| 57731     | 645       | SPTBN4    | BLVRB     | 1                     | 14677.3 | -0.023 |
| 80128     | 200185    | TRIM46    | KRTCAP2   | 0.134                 | 16148.5 | -0.063 |
| 8799      | 114814    | PEX11B    | GNRHR2    | 0.863                 | 18990.2 | -0.226 |
